# Supplementary material for: Synthesis of different crystallographic FeOOH catalysts for peroxymonosulfate activation towards organic matter degradation
Source: Royal Society of Chemistry journal article supplement (doi:10.1039/c7ra12615h), 2018-01-01
Supplement: c7ra12615h1.pdf [file c7ra12615h1.pdf]

# **Synthesis of Different Crystallographic FeOOH for Peroxymonosulfate Activation towards organic matters degradation**

Junyu Fan,<sup>1</sup> Zhaoxia Ding,<sup>1</sup> Zhiwei Zhao,<sup>2,\*</sup> Jie Liu<sup>1,\*</sup>

1. Department of Military Facilities, Army Logistics University, Chongqing, 401311, China

2. Key laboratory of the Three Gorges Reservoir Region's Eco-Environment, State Ministry of Education, Chongqing University, Chongqing, 400045, China

## **Corresponding Author**

Jie Liu: Tel.: + 86 (23) 8673 0631, e-mail: [liujiely@hotmail.com](mailto:liujiely@hotmail.com)

Zhiwei Zhao: e-mail: zhaozhiweiht@gmail.com

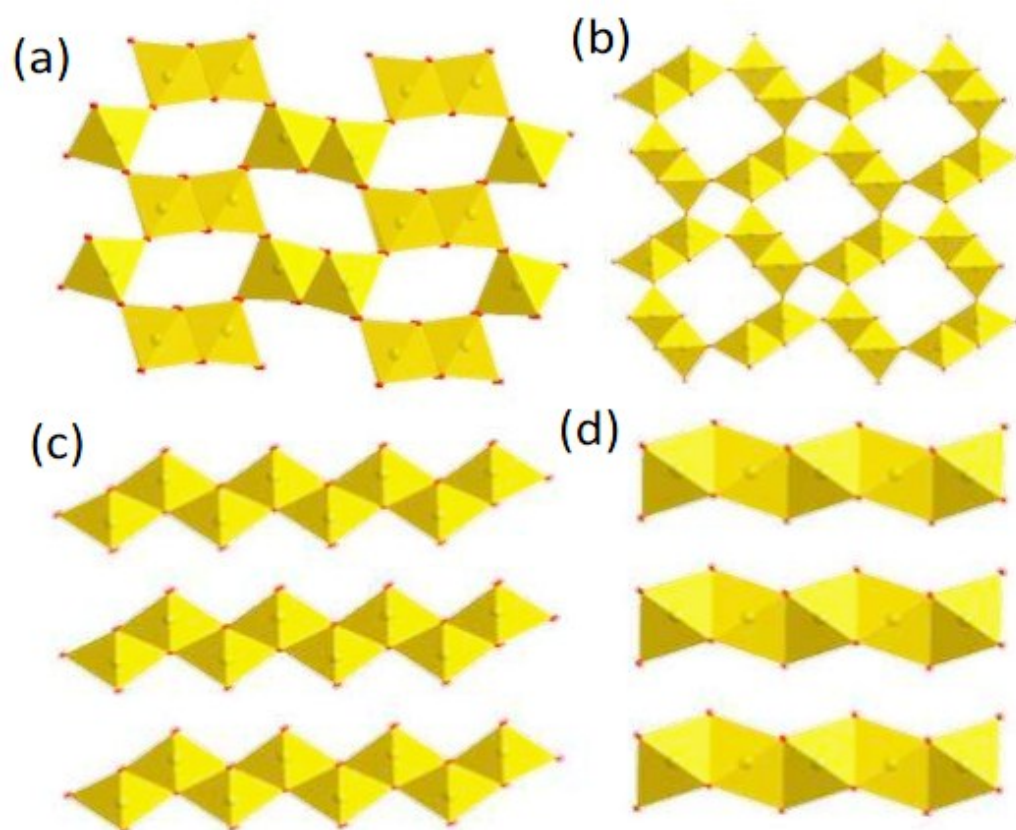

**Fig. S1** Structures of the FeOOH polymorphs. (a)  $\alpha$ -FeOOH (goethite), (b)  $\beta$ -FeOOH (akaganeite), (c)  $\gamma$ -FeOOH (lepidocrocite) and (d)  $\delta$ -FeOOH (feroxyhyte).

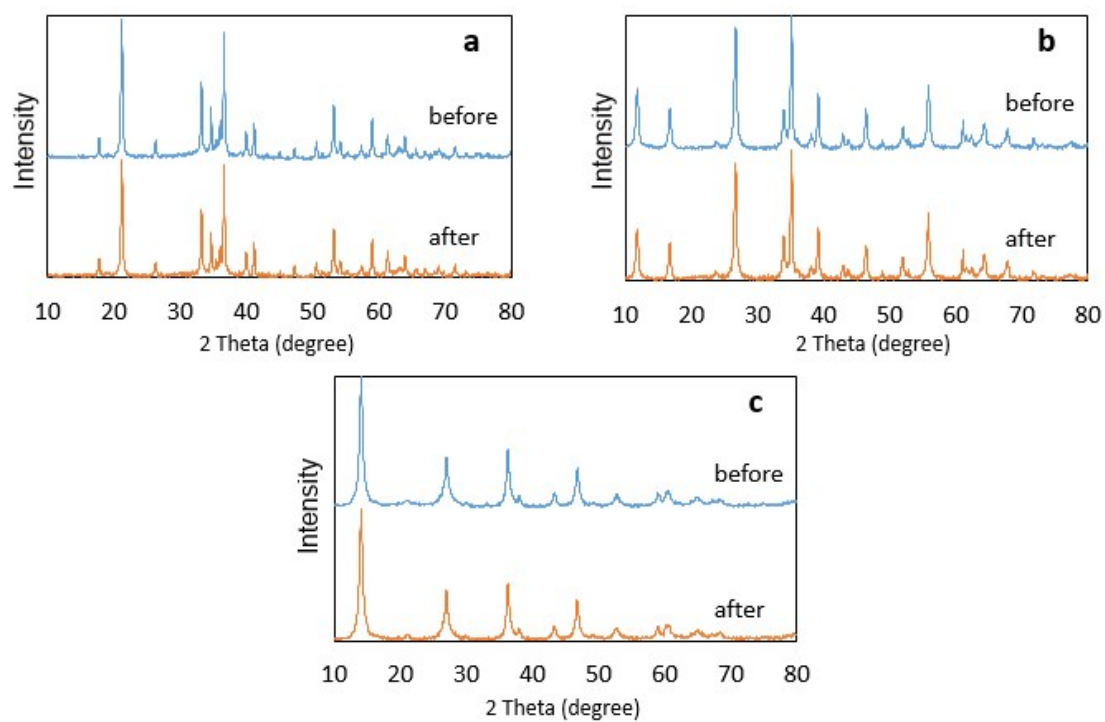

**Fig. S2** XRD patterns of synthesized  $\alpha$ -FeOOH,  $\beta$ -FeOOH and  $\gamma$ -FeOOH before and after used 6 times in PMS/ $\delta$ -FeOOH/AO7 system.

**Table S1.** Decolorization efficiency of AO7 with catalyst of  $\alpha$ -FeOOH,  $\beta$ -FeOOH and  $\gamma$ -FeOOH during six consecutive cycles.

| Time of reusability | Decolorization efficiency (%) |                |                 |
|---------------------|-------------------------------|----------------|-----------------|
|                     | $\alpha$ -FeOOH               | $\beta$ -FeOOH | $\gamma$ -FeOOH |
| 1                   | 42%                           | 24.9%          | 29.5%           |
| 2                   | 40.4%                         | 24.5%          | 27.9%           |
| 3                   | 39.2%                         | 24.2%          | 27.1%           |
| 4                   | 38.7%                         | 24.2%          | 26.5%           |
| 5                   | 38.1%                         | 23.9%          | 26.0%           |
| 6                   | 37.6%                         | 23.7%          | 25.6%           |

**Table S2.** Metal ions leaching amount of  $\alpha$ -FeOOH,  $\beta$ -FeOOH and  $\gamma$ -FeOOH during six consecutive cycles.

| Time of reusability | Iron leaching concentration ( $\mu\text{g L}^{-1}$ ) |                |                 |
|---------------------|------------------------------------------------------|----------------|-----------------|
|                     | $\alpha$ -FeOOH                                      | $\beta$ -FeOOH | $\gamma$ -FeOOH |
| 1                   | 5.11                                                 | 5.24           | 4.85            |
| 2                   | 4.98                                                 | 4.92           | 4.82            |
| 3                   | 4.76                                                 | 4.83           | 4.39            |
| 4                   | 4.32                                                 | 4.43           | 4.51            |
| 5                   | 3.94                                                 | 4.65           | 4.03            |
| 6                   | 3.49                                                 | 4.29           | 3.87            |
